# Supplementary material for: Atorvastatin is unlikely to prevent rheumatoid arthritis in high risk individuals: results from the prematurely stopped STAtins to Prevent Rheumatoid Arthritis (STAPRA) trial
Source: PubMed Central journal article supplement — RMD Open. 2021 Mar 7;7(1):e001591. doi: 10.1136/rmdopen-2021-001591 (PMC7942258; doi:10.1136/rmdopen-2021-001591), 2021-03-07
Supplement: rmdopen-2021-001591supp002.pdf [file rmdopen-2021-001591supp002.pdf]

**Supplementary File 2** STARPA trial safety outcomes

|                                                                                         | Atorvastatin (n=31) | Placebo (n=31) |
|-----------------------------------------------------------------------------------------|---------------------|----------------|
| <i>Self-reported side effects</i>                                                       |                     |                |
| Muscle cramps or pain                                                                   | 10                  | 10             |
| Gastrointestinal symptoms                                                               | 5                   | 4              |
| Skin and subcutaneous symptoms                                                          | 4                   | 2              |
| Sleep problems                                                                          | 0                   | 3              |
| Cough                                                                                   | 1                   | 3              |
| <i>Laboratory abnormalities</i>                                                         |                     |                |
| ALT elevation >3x ULN                                                                   | 3                   | 0              |
| CK >3x ULN                                                                              | 2                   | 0              |
| <i>Adverse events other, according to ICD-10 chapter</i>                                |                     |                |
| Infectious and parasitic disease                                                        | 9                   | 8              |
| Neoplasms                                                                               | 1*                  | 0              |
| Blood and blood-forming organs and immune system disease                                | 1                   | 2              |
| Endocrine, nutritional, and metabolic disease                                           | 1                   | 1†             |
| Mental and behavioral disorder                                                          | 0                   | 1              |
| Nervous system                                                                          | 1                   | 1              |
| Eye and adnexa                                                                          | 0                   | 3              |
| Respiratory disease                                                                     | 1                   | 4              |
| Digestive system                                                                        | 2                   | 1              |
| Musculoskeletal and connective tissue disease                                           | 1                   | 1              |
| Genitourinary system disease                                                            | 1                   | 1              |
| Symptoms, signs, and abnormal clinical and laboratory findings not classified elsewhere | 2                   | 3              |
| Injury                                                                                  | 3                   | 1              |
| None                                                                                    | 8                   | 11             |

\* Serious adverse event. Diagnosis metastasized colon carcinoma

† = Serious adverse event. One night of hospitalization due to abdominal pain, not diagnosed

Both SAEs were not considered to be related to trial medication.

ULN: upper limit of normal
